# Supplementary material for: UNC-6 compensate for the loss-of DCC/UNC-40 in regulating C. elegans germ cell apoptosis, depending on the presence of Netrin-1/UNC-6
Source: Research Square preprint supplement (doi:10.21203/rs.3.rs-7100004/v1), 2025-07-16
Supplement: Supplementary file 1 [file 2e277a055b0d251029015bb3.xlsx]

## Sheet: Tabelle1
reagent	company	product number
Acridine orange	Thermofisher	A1301
RNA extraction kit	Thermofisher	12183018A
cDNA Reverse Transcription Kit	Thermofisher	4368814
qPCR kit	Thermofisher	11746500
