# Supplementary material for: UNC-6 compensate for the loss-of DCC/UNC-40 in regulating C. elegans germ cell apoptosis, depending on the presence of Netrin-1/UNC-6
Source: Research Square preprint supplement (doi:10.21203/rs.3.rs-7100004/v1), 2025-07-16
Supplement: Supplementary file 2 [file 8dd8b889744c1acfa7b7d0c8.xlsx]

## Sheet: Tabelle1
worm strains	genotype	origin
N2	wild type	CGC
CB271	unc-40(e271)	CGC
NW434	unc-6(ev400)	CGC
CB152	unc-5(e152)	CGC
MT324	unc-40(n324)	CGC
RNAi bacteria
ced-10	Ahringer library
unc-40	Ahringer library
unc-5	Ahringer library
